# Supplementary material
Source: PubMed Central journal article supplement (PMC3041938)

Supplemental Data

**Figure S1. Clusterin inhibits H<sub>2</sub>O<sub>2</sub>-induced ROS production in H9c2 cells.**

After 2h pre-incubation with 10 µg/ml clusterin, H9c2 cells were treated with different concentration of H<sub>2</sub>O<sub>2</sub> (0–400µM) for 2 h. For measuring ROS production, the cells were labeled with DCFH-DA. Quantitative analysis was performed by measuring the fluorescence intensity. Each value represents the mean ± SD of three independent experiments (\**P* < 0.05).

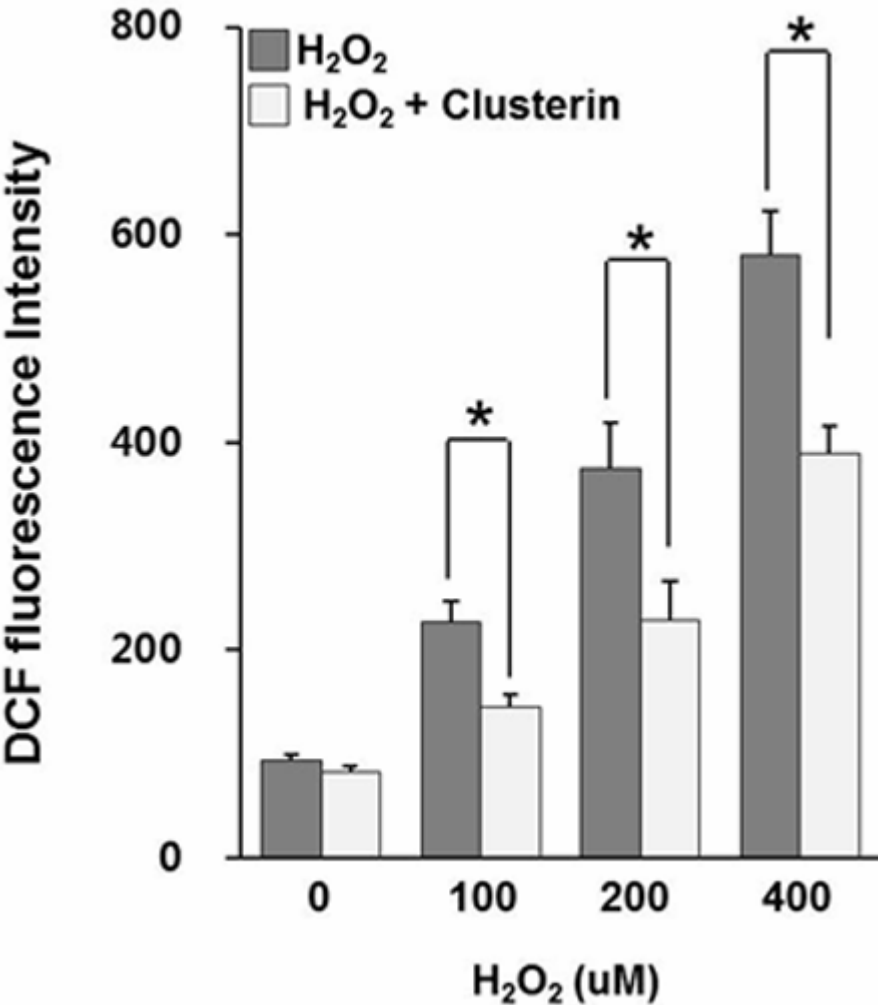

Supplement: emm-43-53-s001.pdf [file emm-43-53-s001.pdf]
